# Supplementary material
Source: MDPI journal article supplement (https://www.mdpi.com/2073-4441/12/10/2840)
Supplement: s1 [file s1]

## Supplementary data

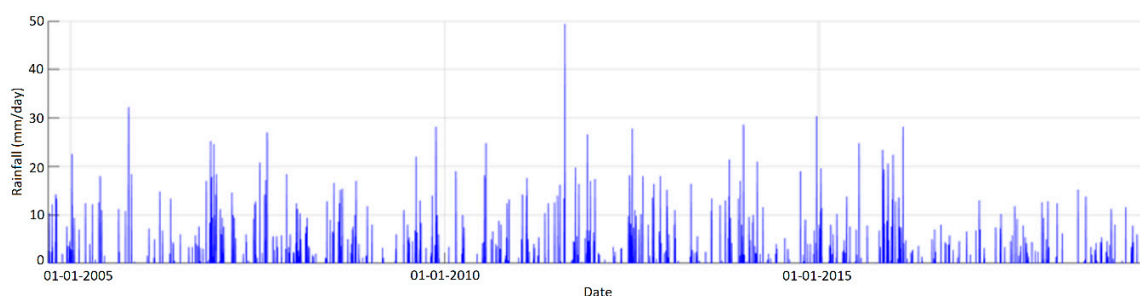

**Fig. S1.** Daily rainfall at Dalmarnock STW between 16/09/2004 and 31/05/2019.

**Table S.1.** Parameters for water non-potable purposes uses (ANA, 2005).

| Parameter                              | Limit               |
|----------------------------------------|---------------------|
| Fecal coliforms (CFU/100 mL)           | Not detectable      |
| pH                                     | Between 6.0 and 9.0 |
| Colour (HU)                            | ≤ 10 HU             |
| Turbidity (NTU)                        | ≤ 2 NTU             |
| Odour and aspect                       | Not unpleasant      |
| Oil and grease (mg/L)                  | ≤ 1 mg/L            |
| Biochemical oxygen demand (BOD) (mg/L) | ≤ 10 mg/L           |
| Volatile Organic Compounds (VOCs)      | Absent              |
| Nitrate (mg/L)                         | < 10 mg/L           |
| Ammoniacal nitrogen (mg/L)             | ≤ 20 mg/L           |
| Nitrite (mg/L)                         | ≤ 1 mg/L            |
| Total phosphorus (mg/L)                | ≤ 0.1 mg/L          |
| Total suspended solids (TSS) (mg/L)    | ≤ 5 mg/L            |
| Total dissolved solids* (TDS) (mg/L)   | ≤ 500 mg/L          |

\*Recommended for washing clothes and vehicles.

**Table S2.** Midpoint impact categories considered for the study.

| Categories of environmental impacts      | Units                   |
|------------------------------------------|-------------------------|
| Global warming                           | kg CO <sub>2</sub> eq   |
| Stratospheric ozone depletion            | kg CFC-11 eq            |
| Ozone formation (Human health)           | kg NO <sub>x</sub> eq   |
| Fine particulate matter formation        | kg PM <sub>2,5</sub> eq |
| Ozone formation (Terrestrial ecosystems) | kg NO <sub>x</sub> eq   |
| Terrestrial acidification                | kg SO <sub>2</sub> eq   |
| Terrestrial ecotoxicity                  | kg 1,4-DCB              |
| Freshwater ecotoxicity                   | kg 1,4-DCB              |
| Marine ecotoxicity                       | kg 1,4-DCB              |
| Human carcinogenic toxicity              | kg 1,4-DCB              |
| Human non-carcinogenic toxicity          | kg 1,4-DCB              |
| Land use                                 | m <sup>2</sup> a eq     |
| Mineral resource scarcity                | kg Cu eq                |
| Fossil resource scarcity                 | kg oil eq               |
| Water depletion                          | m <sup>3</sup>          |

**Table S3.** Annual rainfall at Dalmarnock STW between 2005 and 2018.

| Year    | Rainfall at Dalmarnock STW (mm) |
|---------|---------------------------------|
| 2005    | 927                             |
| 2006    | 1081                            |
| 2007    | 1025                            |
| 2008    | 1229                            |
| 2009    | 932                             |
| 2010    | 799                             |
| 2011    | 1365                            |
| 2012    | 1199                            |
| 2013    | 959                             |
| 2014    | 967                             |
| 2015    | 1304                            |
| 2016    | 928                             |
| 2017    | 891                             |
| 2018    | 842                             |
| Average | 1032                            |

**Table S4.** Lengths of different types of roads in Glasgow.

| Type of road        | Length of roads (km) |
|---------------------|----------------------|
| Motorways           | 55                   |
| Motorway Slip roads | 50                   |
| A roads             | 138                  |
| B roads             | 64                   |
| C roads             | 209                  |
| Unclassified roads  | 1422                 |
| Total               | 1938                 |

Source: Transport Scotland, 2019.

**Table S5.** Average width of different road categories in Glasgow.

| Type of road                                      | Width (m) | Standard deviation (m) |
|---------------------------------------------------|-----------|------------------------|
| A roads                                           | 18.97     | 3.90                   |
| B roads                                           | 15.98     | 4.31                   |
| Unclassified roads / C roads in the city centre   | 18.20     | 1.93                   |
| Unclassified roads / C roads in residential areas | 12.29     | 3.48                   |

**Table S6.** Total paved area in Glasgow.

| Type of road           | Area (m <sup>2</sup> ) |
|------------------------|------------------------|
| A Roads                | 2,617,860              |
| B Roads                | 1,022,720              |
| Unclassified / C Roads | 24,864,595             |
| Total                  | 28,505,175             |

**Table S7.** Quantities of the components used in the proposed system (permeable pavement and stormwater harvesting).

| Subsystem             | Function          | Components                                    | Materials               | Quantity        |            |        |
|-----------------------|-------------------|-----------------------------------------------|-------------------------|-----------------|------------|--------|
| Stormwater harvesting |                   | Upper tanks (295 x 500 litres)                | HDPE                    | 2,950 kg        |            |        |
|                       |                   | Concrete for lower tank (500 m <sup>3</sup> ) | Concrete                | 540,000 kg      |            |        |
|                       |                   | Formwork for lower tank                       | Wood                    | 18,720 kg       |            |        |
|                       |                   | Steel bar for lower tank                      | Steel                   | 34,875 kg       |            |        |
|                       |                   | Waterproof membrane for lower tank            | Asphalt                 | 1,275 kg        |            |        |
|                       | Storage           |                                               | Overflow siphon         | PE              | 25 kg      |        |
|                       |                   |                                               |                         | HDPE            | 1 kg       |        |
|                       |                   |                                               |                         | Brass           | 2.5 kg     |        |
|                       |                   |                                               | Floating set of suction | Silicone        | 26 kg      |        |
|                       |                   |                                               |                         | Stainless steel | 0.5 kg     |        |
|                       |                   |                                               |                         | Brass           | 2 kg       |        |
|                       |                   |                                               |                         | PS              | 3 kg       |        |
|                       | Pumping           |                                               | Level electro buoy      | HDPE            | 3.5 kg     |        |
|                       |                   |                                               |                         | Solenoid valve  | Brass      | 7.5 kg |
|                       |                   |                                               |                         | Register        | Brass      | 4 kg   |
| Water pumps           |                   |                                               |                         | Cast iron       | 38 kg      |        |
| Distribution          |                   | Pipes                                         | PVC                     | 741.55kg        |            |        |
|                       |                   |                                               | Connections             | PVC             | 162.5 kg   |        |
|                       |                   |                                               | Water pumps             | Electricity     | 64,430 kWh |        |
| Permeable pavement    | Roads and pavings | Waterproof membrane                           | Asphalt                 | 85,515 kg       |            |        |
|                       |                   | Crushed stone                                 | Stone                   | 13,052,440 kg   |            |        |
|                       |                   | Asphalt binder                                | Asphalt                 | 475,506 kg      |            |        |
|                       | Drainage          | Drains                                        | Pre-cast concrete       | 89,712 kg       |            |        |
|                       | Cleaning          | Sweeper                                       | Diesel                  | 1,200 litres    |            |        |

**Table S8.** Quantities of the components used in the current scenario (traditional pavement and drainage).

| Subsystem                                       | Function                   | Components                   | Materials | Quantity               |
|-------------------------------------------------|----------------------------|------------------------------|-----------|------------------------|
| Traditional pavement                            | Roads and pavings          | Diluted asphalt              | Asphalt   | 34,204 kg              |
|                                                 |                            | Petroleum asphalt cement     | Asphalt   | 136,618 kg             |
|                                                 |                            | Hot mix asphalt              | Asphalt   | 2,277,035 kg           |
|                                                 |                            | Crushed stone                | Stone     | 9,235,134 kg           |
| Conventional drainage                           | Drainage                   | Concrete for gutters         | Concrete  | 54,960 kg              |
|                                                 |                            | Precast concrete for gutters | Concrete  | 343,488 kg             |
|                                                 |                            | Formwork                     | Wood      | 134 kg                 |
|                                                 |                            | Sand for mortar              | Sand      | 7,017 kg               |
|                                                 |                            | Cement for mortar            | Cement    | 946 kg                 |
|                                                 |                            | Brick                        | Brick     | 20,160 kg              |
|                                                 |                            | Precast concrete pipes       | Concrete  | 162,960 kg             |
| Potable water supply (for non-potable purposes) | Water treatment and supply | --                           | --        | 669,864 m <sup>3</sup> |
